# Supplementary material for: Growth limits in platinum oxides formed on Pt-skin layers on Pt–Co bimetallic nanoparticles
Source: Royal Society of Chemistry journal article supplement (doi:10.1039/c0cc04016a), 2011-01-01
Supplement: c0cc04016a.pdf [file c0cc04016a.pdf]

Supplementary Material (ESI) for Chemical Communications  
This journal is (c) The Royal Society of Chemistry 2011

# Growth limits in platinum oxides formed on Pt-skin layers on Pt-Co bimetallic nanoparticles

Hideto Imai,<sup>\*a</sup> Masashi Mastumoto,<sup>a</sup> Takashi Miyazaki,<sup>a</sup> Kazuo Kato,<sup>b</sup> Hajime Tanida,<sup>b</sup> and Tomoya Uruga<sup>b</sup>

<sup>a</sup> Green Innovation Research Laboratories, NEC Corporation, 34 Miyukigaoka, Tsukuba, Japan. Fax: +81 29 856 6137; Tel: +81 29 850 1533; E-mail: h-imai@ce.jp.nec.com

<sup>b</sup> Japan Synchrotron Radiation Research Institute, 1-1-1 Kouto, Sayo-cho, Hyogo, 679-5198, Japan

## electronic supplementary information

### Experimental details

Carbon-supported Pt<sub>3</sub>Co nanoparticles were obtained from Tanaka Kikinzo Kogyo (TKK). The chemical composition of the bimetallic Pt-Co alloy was determined to be Co 22 at% through energy-dispersive x-ray analyses. The loading of the metallic components was 42 wt% relative to the carbon support. The average particles size was estimated to be approximately 4.2 nm in diameter determined by transmission electron microscopy.

Platinum catalysts (50wt %, supported on Ketjen black) were prepared with the standard platinum-oxide colloidal method. The average particles size was 2.0 nm. Since larger Pt particles are generally more stable than smaller Pt particles especially below 5 nm<sup>1</sup>, we carefully compared the oxidation behavior between Pt<sub>3</sub>Co (4.2 nm) and Pt (2 nm). Although no systematic studies have been done to date, the surface oxidation rate could be faster for smaller nanoparticles, due to modifications to the surface energy or electronic states, similar to enhanced specific activity in smaller Pt nanoparticles.<sup>2</sup>

The catalyst electrode was prepared by spreading a suspension of carbon-supported Pt<sub>3</sub>Co nanoparticles dispersed in Nafion® solution onto a thin carbon electrode (thickness: 120 μm). The electrochemical cell was designed for x-ray absorption spectroscopy (XAS) in a transmission configuration.<sup>3</sup> The electrochemical cell consisted of the sample, counter, and reference electrodes, like a standard three-electrode electrochemical cell, except for a very thin electrolyte region along the x-ray pathway. The inert atmosphere in the cell was maintained by purging it with ultra-pure nitrogen gas.

Prior to the XAS measurements, the catalysts were electrochemically cleaned by repeating cyclic voltammetry scans (10–20 times) between 0.05 and 1.2 V. After the experiments on potential-step oxidation, the form of CV was exactly identical, indicating that the present Pt<sub>3</sub>Co nanoparticles were stable at least under these experimental conditions.

### X-ray absorption spectroscopy measurements and data analyses

XAS analyses were carried out with standard procedures using REX2000. The  $k^3$ -weighted  $\chi(k)$  data ranging from 2.5 to 14.0 Å<sup>-1</sup> was Fourier-transformed into  $r$ -space for non-linear curve fitting.

The backscattering amplitudes and phase shifts for all atom pairs were theoretically calculated with FEFF8 code.<sup>4</sup>

### Structural model for nominal Pt<sub>3</sub>Co nanoparticles with Pt-skin layers

Figure S1 plots the EXAFS data (EXAFS oscillation and Fourier transform) for the electrochemically cleaned Pt<sub>3</sub>Co (taken at 0.4 V vs. RHE). The fitting parameters are listed in Table S1.

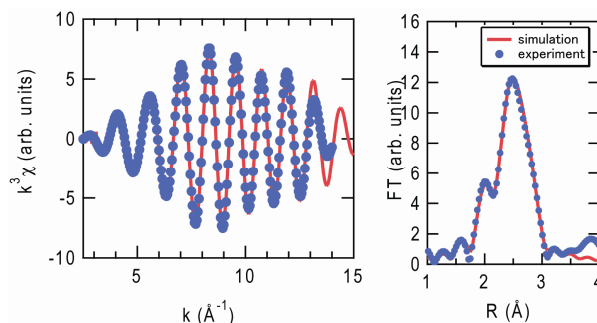

Fig. S1. EXAFS spectra in  $k$ -space and  $r$ -space for Pt<sub>3</sub>Co (0.4 V vs. RHE) Simulation was done assuming Pt-Pt and Pt-Co bonds.

|       | CN     | R       | E <sub>0</sub> | DW      |
|-------|--------|---------|----------------|---------|
| Pt-Pt | 9.0(9) | 2.72(1) | -2.2(6)        | 0.08(0) |
| Pt-Co | 1.6(3) | 2.63(9) | 0.57(4)        | 0.07(9) |

Table S2 Fitting parameters for electrochemically cleaned Pt<sub>3</sub>Co nanoparticles. CN and DW stand for Coordination Number and Debye-Waller factor.

To obtain an average structure of Pt<sub>3</sub>Co nanoparticles with Pt-skin layers (inset of Fig. 1(a)), we assumed a simple spherical model that consisted of a Pt<sub>3</sub>Co inner-core and a Pt shell with a diameter of 4.2 nm. For the Pt<sub>3</sub>Co core with a diameter of approximately 3.5 nm, we obtained a number of Pt-Pt and Pt-Co bonds and the coordination numbers listed in Table S2, which almost agree with the experimental data.

If Co atoms partly segregate in the inner core, the Pt-skin layers should become thinner, because the coordination number for Pt-Pt in the core part increases; consequently, the Pt-Pt coordination number for the Pt-skin layers decreases.

| Bonds | Number of bonds (model) | Coordination number (model) | Coordination number (experiments) |
|-------|-------------------------|-----------------------------|-----------------------------------|
| Total | 29172                   | 10.75                       | 10.72                             |
| Pt-Pt | 24504                   | 9.03                        | 9.09                              |
| Pt-Co | 4668                    | 1.72                        | 1.63                              |

Table S2 Numbers of Pt bonds and coordination numbers for Pt<sub>3</sub>Co model and those obtained from experiments.

<sup>1</sup> E. F. Holby, W. Sheng, Y. Shao-Horn, and D. Morgan, *Energy. Environ. Sci.* **2009**, *2*, 865.

<sup>2</sup> K. J. Mayrhofer, B.B. Blizanac, M. Arenz, V. Stamenkovic, P. N. Ross, and N. M. Markovic, *J. Phys. Chem. B*, **2005**, *109*, 14433.

<sup>3</sup> Imai, H.; Izumi, K.; Matsumoto, M.; Kubo, Y.; Kato, K.; Imai, Y. *J. Am. Chem. Soc.* **2009**, *131*, 6293-6300.

<sup>4</sup> Zabinski, S. I.; Rehr, J. J.; Ankudinov, A.; Albers, R. C.; Eller, M. *Phys. Rev. B* **1995**, *52*, 2995.
